# Supplementary material
Source: Springer Nature journal article supplement (https://www.springermedizin.de/resource/supplementary/12872_2013_683_MOESM6_ESM.pdf/9430648)

**A**

Day 0

Day 6

Undepleted

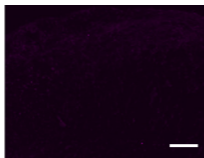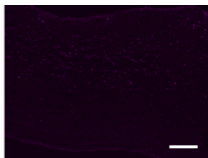

Collagenase

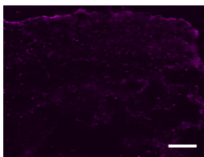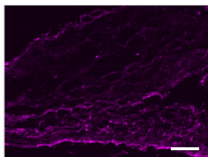**B**

ALP Production (% of control)

300  
250  
200  
150  
100  
50  
0

Undepleted

Collagenase

\*

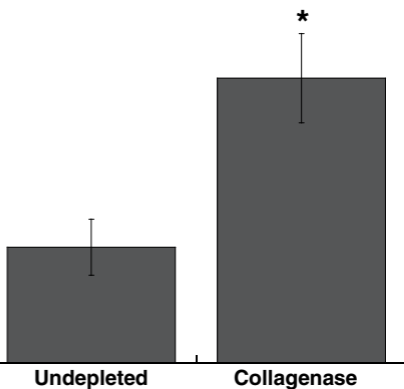

Supplement: MOESM6 [file 9430648]
